# Supplementary material for: Dense binary Fe–Cu sites promoting CO2utilization enable highly reversible hybrid Na–CO2batteries
Source: Royal Society of Chemistry journal article supplement (doi:10.1039/d1ta06611k), 2021-01-01
Supplement: d1ta06611k1.pdf [file d1ta06611k1.pdf]

## Supporting Information

### Dense Binary Fe-Cu Sites Promoting CO<sub>2</sub> Utilization Enable High Reversible Hybrid Na-CO<sub>2</sub> Battery

Changfan Xu<sup>1</sup>, Jing Zhan<sup>1,2\*</sup>, Huanwei Wang<sup>1</sup>, Yao Kang<sup>3</sup>, Feng Liang<sup>3</sup>

1. School of Metallurgy and Environment, Central South University,  
Changsha 410083, China;

2. National Engineering Laboratory for High Efficiency Recovery of  
Refractory Nonferrous Metals Resources, Changsha 410083, China;

3. Faculty of Metallurgical and Energy Engineering, Kunming University of  
Science and Technology, Kunming 650093, China

\* Corresponding Authors

\* E-mail: zhanjing@csu.edu.cn (Jing Zhan); liangfeng@kust.edu.cn (Feng  
Liang)

## Figures and Tables

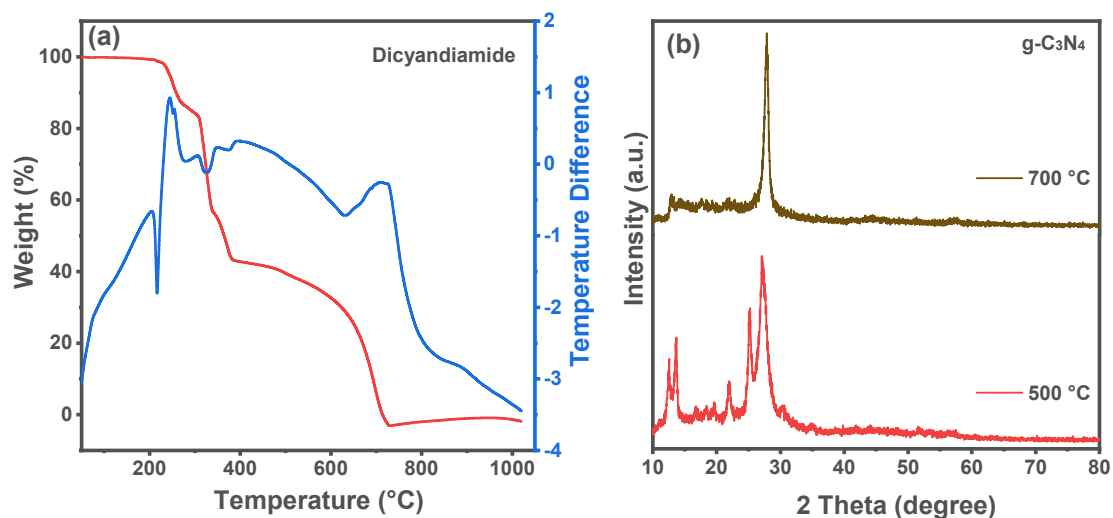

Figure S1 (a) TG-TDA curves of dicyandiamide, (b) XRD patterns of dicyandiamide pyrolysis products at 500 °C and 700 °C in argon

The thermal decomposition behavior of dicyandiamide in argon was first investigated by differential thermal analysis (TG-DSC). As can be seen from Figure S1 (a), the remaining product was zero at temperatures above 720 °C in the argon atmosphere, indicating that the dicyandiamide had completely decomposed and volatilized. As can be seen from the XRD patterns of the dicyandiamide pyrolysis products at 500 °C, 700 °C in Figure S1 (b), the products obtained were all typical of the physical phase of g-C<sub>3</sub>N<sub>4</sub> [60]. No carbon material was obtained upon increasing the temperature to 700 °C. It is thus clear that g-C<sub>3</sub>N<sub>4</sub> does not generate carbon on pyrolysis in the absence of metal ions.

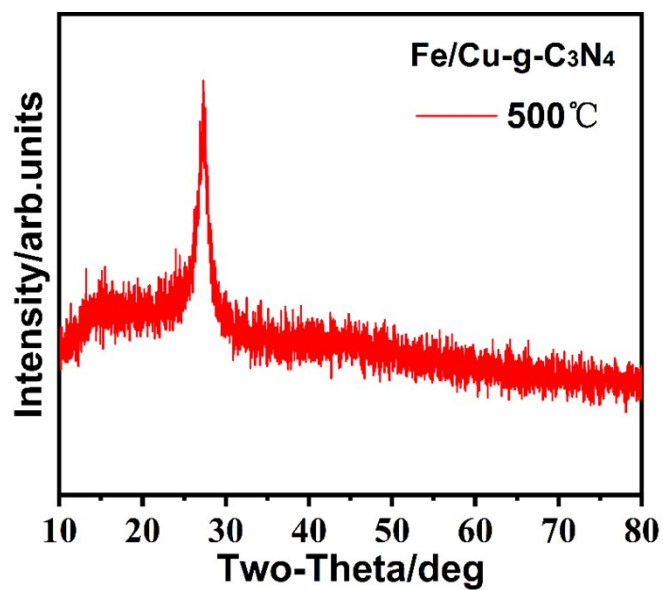

Figure S2 XRD patterns of Fe/Cu-dicyandiamide pyrolysis products at 500 °C in argon

In Fe/Cu-dicyandiamide sample, no peaks corresponding to crystalline metal species such as metal oxides, metal nitrides, metal chlorides, or metal carbides were observed, even when calcined at 500 °C. The absence of metal species peaks suggests that the metal species maintains chemical coordination with the g-C<sub>3</sub>N<sub>4</sub> host, most likely in the form of metal–N bonds.

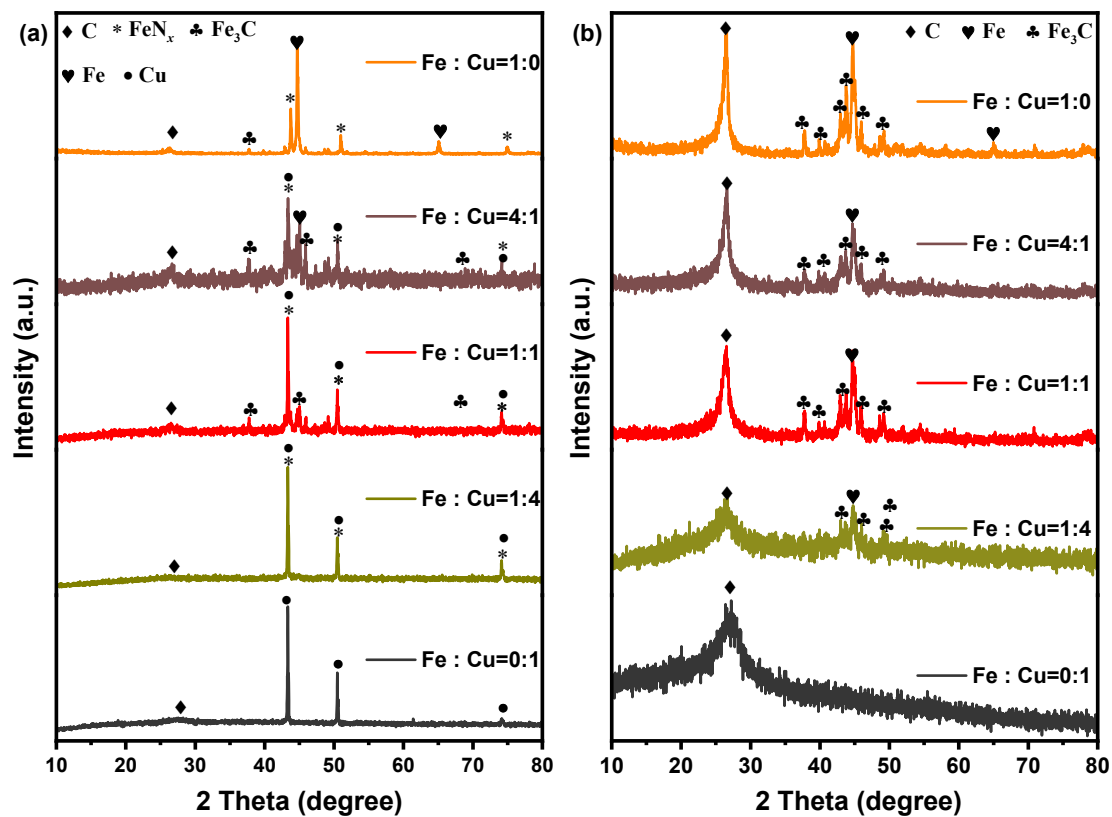

Figure S3 XRD patterns of Fe-Cu-N-C samples obtained with different molar ratios of Fe and Cu (a) before leaching in a solution of H<sub>2</sub>SO<sub>4</sub> and FeCl<sub>3</sub>, (b) after leaching in a solution of H<sub>2</sub>SO<sub>4</sub> and FeCl<sub>3</sub>

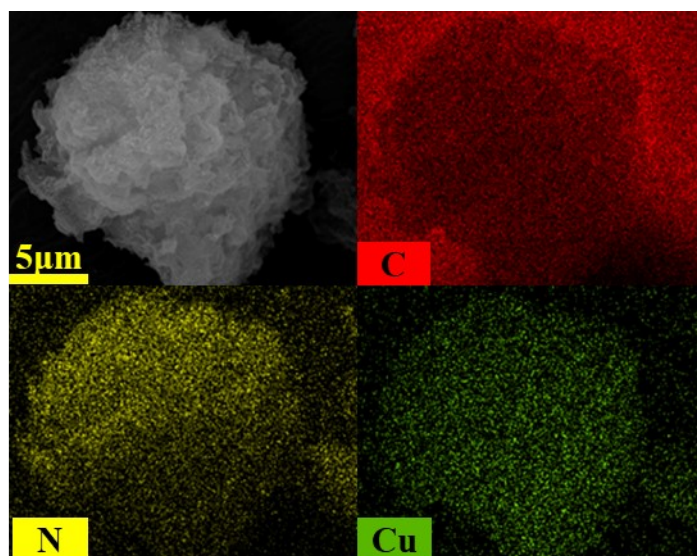

Figure S4 SEM images and the corresponding elemental mapping of Cu-N-C

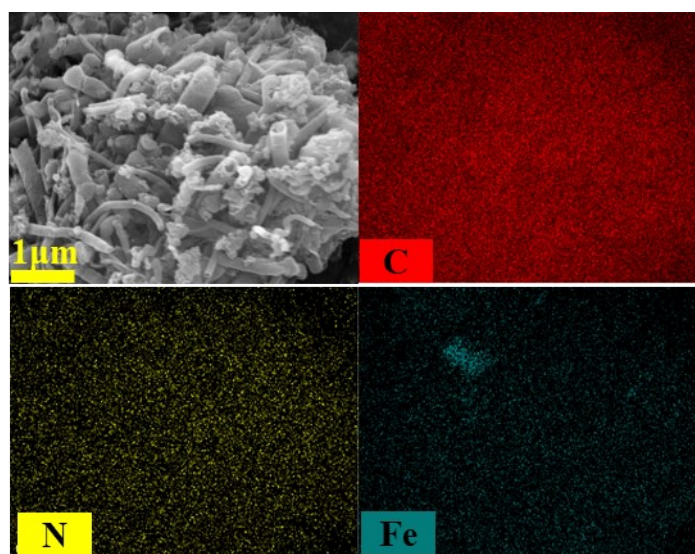

Figure S5 SEM images and the corresponding elemental mapping of Fe-N-C

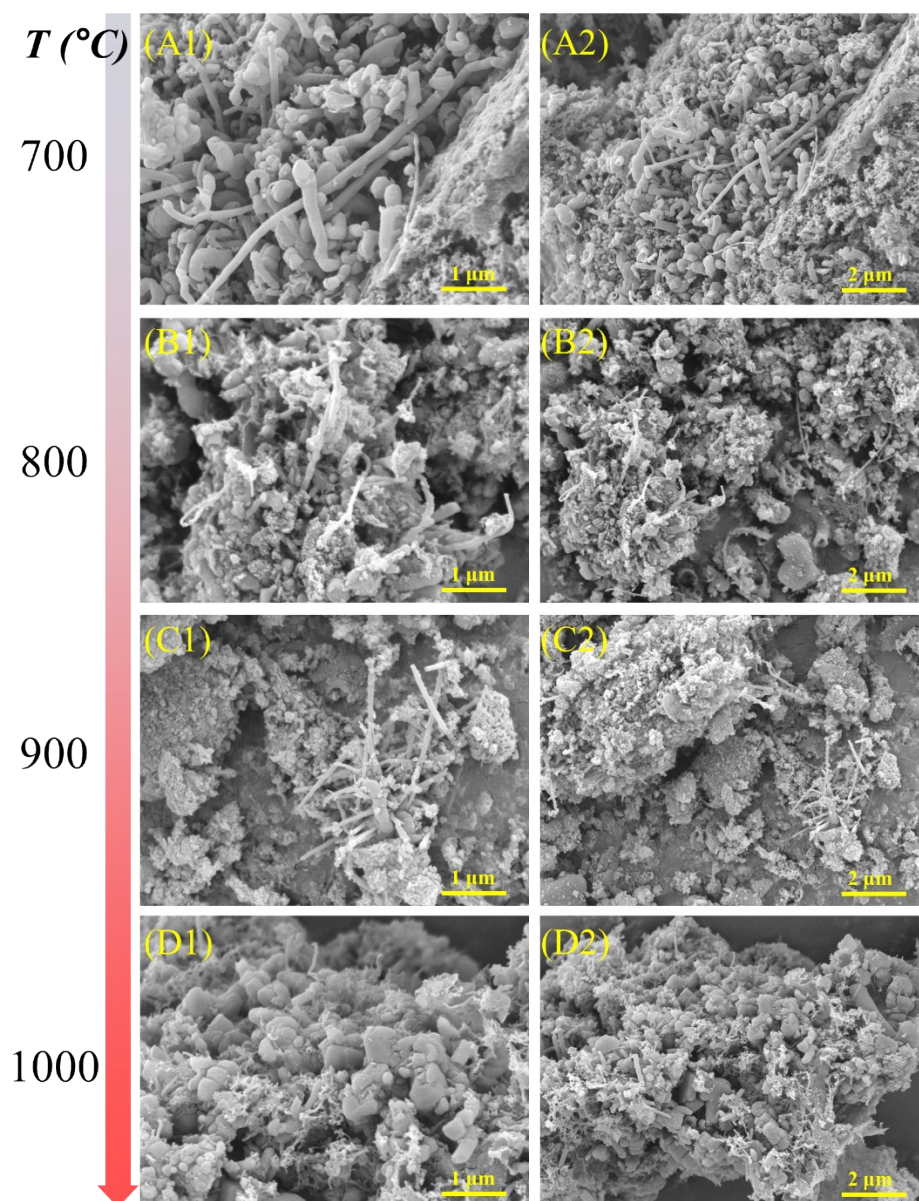

Figure S6 SEM images of Fe-Cu-N-C samples obtained with different heat treatment temperatures (Molar ratio of total metal ions to dicyandiamide: 1:15, and molar ratios of Fe to Cu: 1:1)

(A1–A2) 700 °C, (B1–B2) 800 °C, (C1–C2) 900 °C, (D1–D2) 1000 °C

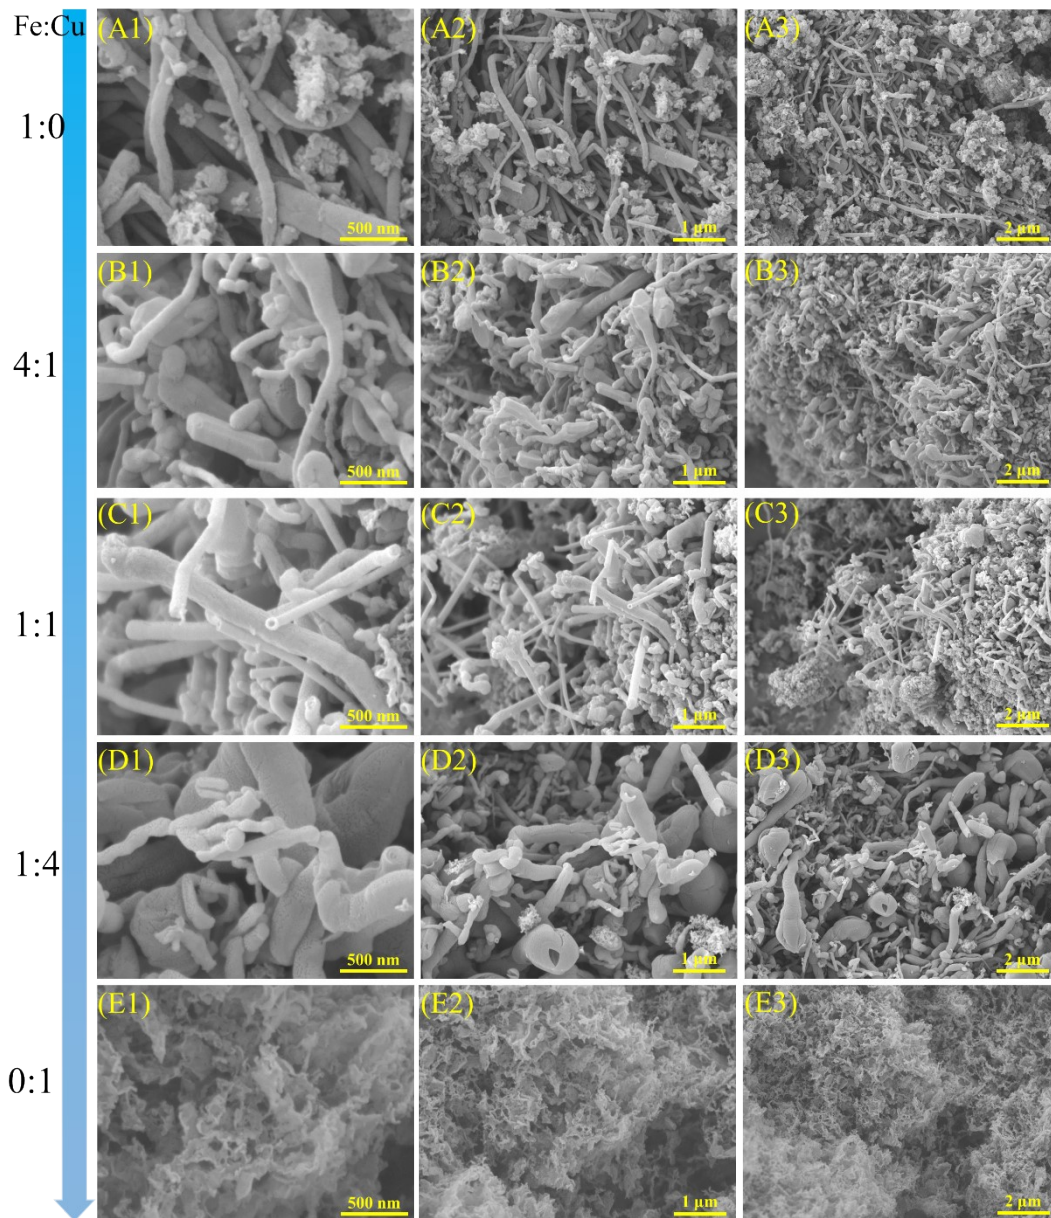

Figure S7 SEM images of Fe-Cu-N-C samples obtained with different molar ratios of Fe and Cu (Molar ratio of total metal ions to dicyandiamide: 1:10, and heat treatment temperature: 700 °C)

(A1–A3) 1:0, (B1–B3) 4:1, (C1–C3) 1:1, (D1–D3) 1:4, (E1–E3) 0:1

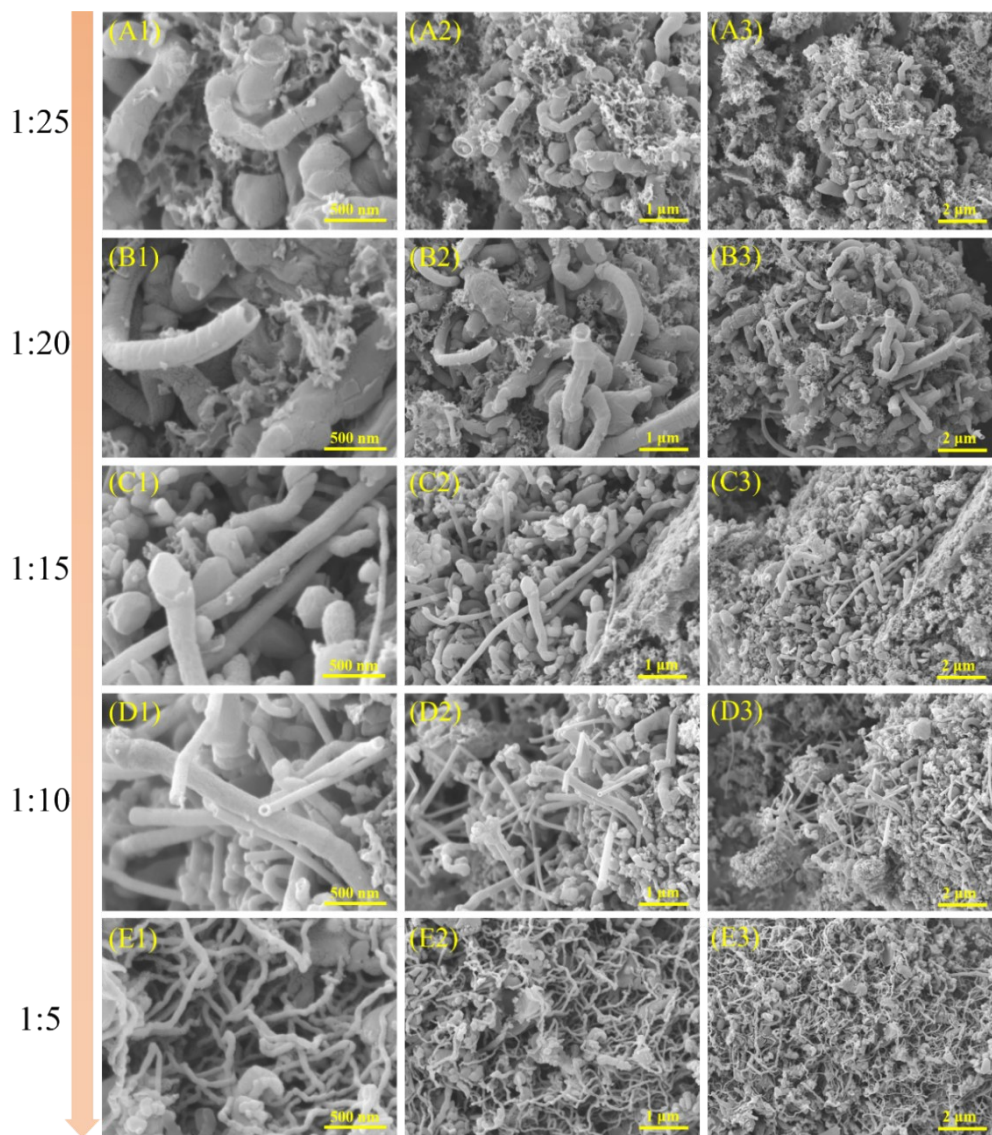

Figure S8 SEM images of Fe-Cu-N-C samples obtained with different molar ratios of total metal ions and dicyandiamide (Molar ratios of Fe to Cu: 1:1, heat treatment temperature: 700 °C)

(A1–A3) 1:25, (B1–B3) 1:20, (C1–C3) 1:15, (D1–D3) 1:10, (E1–E3) 1:5



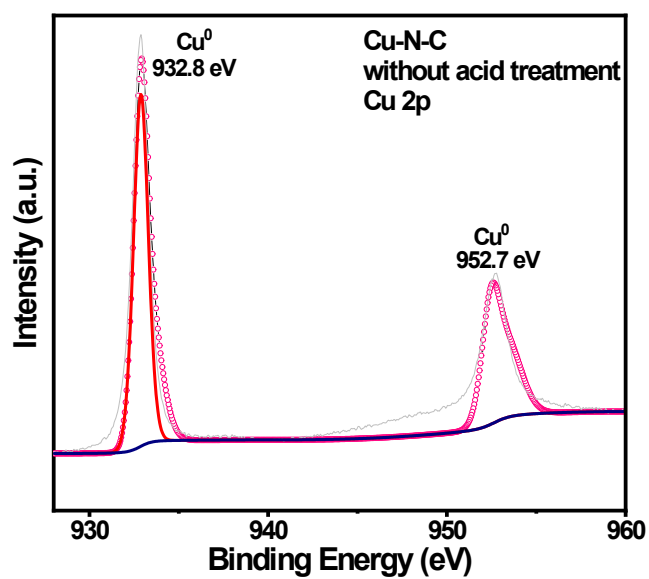

Figure S9 Cu 2p XPS spectra of the Cu-N-C before leaching in a solution of  $\text{H}_2\text{SO}_4$  and  $\text{FeCl}_3$

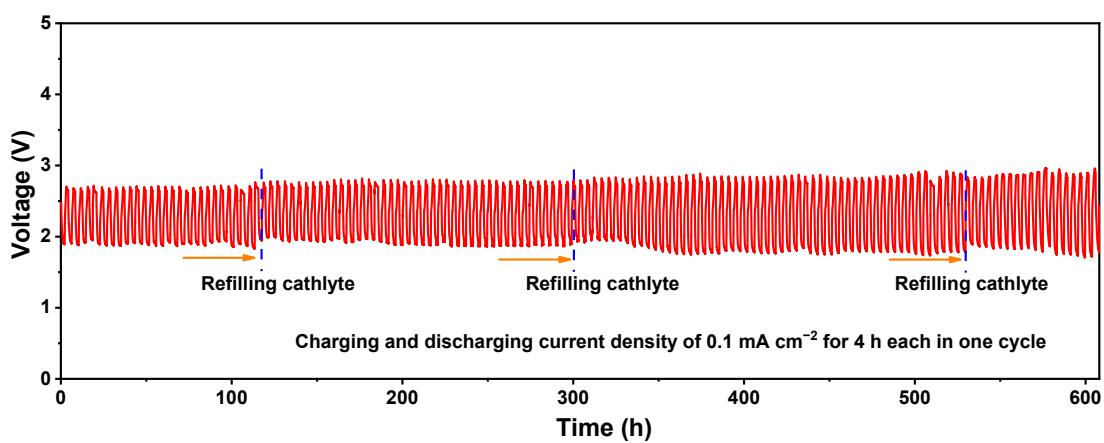

Figure S10 The cycling performance of hybrid Na- $\text{CO}_2$  battery with Fe-Cu-N-C at a current density of  $0.1 \text{ mA} \cdot \text{cm}^{-2}$ , 4 h per cycle

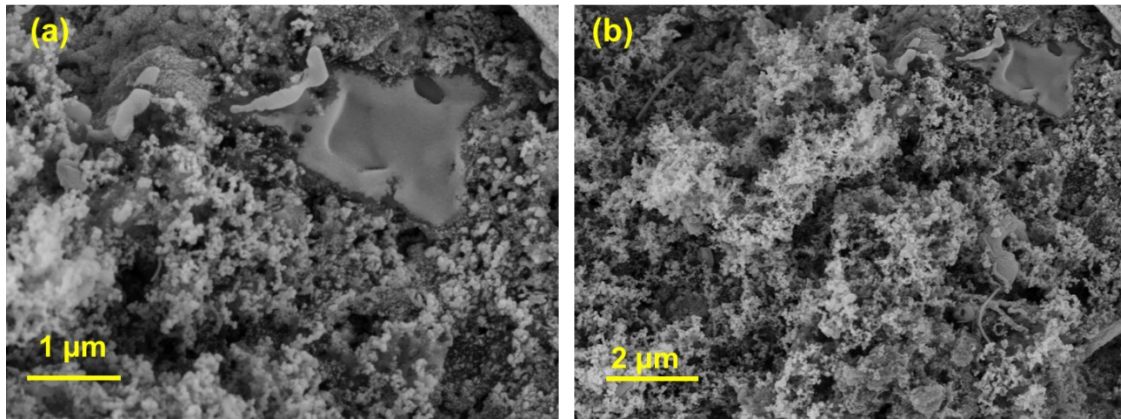

Figure S11 Ex-situ SEM images Fe-Cu-N-C electrode after charge. Hardly any flocculent products were observed.

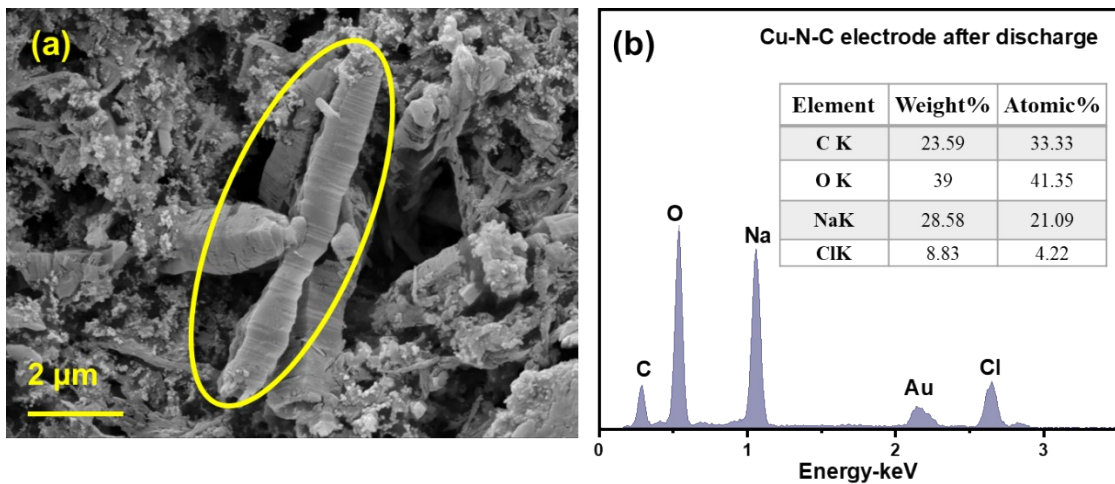

Figure S12 Ex-situ SEM images and EDS results of Cu-N-C electrode after charge. (The undecomposed discharge products are still present.)

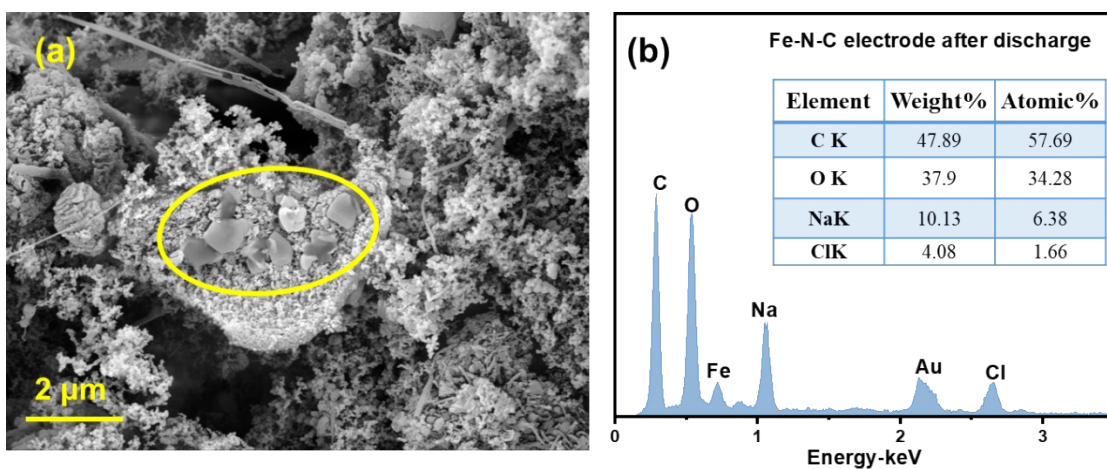

Figure S13 Ex-situ SEM images and EDS results of Fe-N-C electrode after charge. (The undecomposed discharge products are still present.)

Table S1 Specific surface area and pore structure parameters of Fe-N-C, Cu-N-C and Fe-Cu-N-C

| Samples   | $S_{\text{BET}}$<br>( $\text{m}^2 \cdot \text{g}^{-1}$ ) | $S_{\text{DFT}}^{\text{a)}$<br>( $\text{m}^2 \cdot \text{g}^{-1}$ ) | $V_{\text{DFT}}^{\text{b)}$<br>( $\text{cm}^3 \cdot \text{g}^{-1}$ ) | Average pore<br>Diameter |
|-----------|----------------------------------------------------------|---------------------------------------------------------------------|----------------------------------------------------------------------|--------------------------|
| Fe-N-C    | 210                                                      | 175.1                                                               | 0.716                                                                | 14.1 nm                  |
| Cu-N-C    | 133                                                      | 113                                                                 | 0.492                                                                | 16.0 nm                  |
| Fe-Cu-N-C | 141                                                      | 118                                                                 | 0.305                                                                | 9.06 nm                  |

Table S2 Element atomic percentage of Fe-N-C, Cu-N-C, and Fe-Cu-N-C calculated from XPS results

| Sample    | Species concentration (at %) |       |       |      |      |
|-----------|------------------------------|-------|-------|------|------|
|           | C                            | O     | N     | Cu   | Fe   |
| Fe-N/C    | 55.49                        | 42.31 | 2.02  | /    | 0.18 |
| Cu-N/C    | 59.79                        | 8.4   | 30.85 | 0.96 | /    |
| Fe-Cu-N/C | 50.31                        | 44.14 | 5.06  | 0.22 | 0.28 |

Table S3 Distribution of each C species, obtained from fitting the C1s XPS spectra results and corresponding characteristic peak position (normalized to the surface C atoms of each material)

| Sample    | Species concentration (at %) |                    |                    |                   |
|-----------|------------------------------|--------------------|--------------------|-------------------|
|           | C-C                          | C-N                | C-O/C=O            | $\pi-\pi^*$       |
| Fe-N/C    | 39.0<br>(284.6 eV)           | 40.9<br>(285.2 eV) | 12.1<br>(280.0 eV) | 8.0<br>(291.3 eV) |
| Cu-N/C    | 41.7<br>(284.7 eV)           | 40.6<br>(286.3 eV) | 15.5<br>(288.1 eV) | 2.5<br>(290.8 eV) |
| Fe-Cu-N/C | 59.2<br>(284.7 eV)           | 21.8<br>(286.1 eV) | 13.0<br>(287.9 eV) | 6.0<br>(291.6 eV) |

Table S4 Distribution of each N species, obtained from fitting the N1s XPS spectra results and corresponding characteristic peak position (normalized to the surface N atoms of each material)

| Sample    | Species concentration (at %) |                      |                      |                      |                      |
|-----------|------------------------------|----------------------|----------------------|----------------------|----------------------|
|           | Oxidized-N                   | Graphitic-N          | Pyrrolic-N           | M-N <sub>x</sub>     | Pyridinic-N          |
| Fe-N/C    | 31.08<br>(402.75 eV)         | 25.24<br>(401.08 eV) | 12.69<br>(399.93 eV) | 6.05<br>(399.06 eV)  | 24.94<br>(398.34 eV) |
| Cu-N/C    | 3.08<br>(402.15 eV)          | /                    | 35.13<br>(400.05 eV) | 14.41<br>(399.05 eV) | 47.38<br>(398.38 eV) |
| Fe-Cu-N/C | 12.23<br>(402.75 eV)         | 22.59<br>(401.18 eV) | 15.26<br>(399.98 eV) | 20.29<br>(399.09 eV) | 29.64<br>(398.32 eV) |

Table S5 Estimated elemental resistances ( $R_e$ ,  $R_i$ ,  $R_s$ ,  $R_{ct}$ , and  $Z_W$ ) in the equivalent circuits

| Sample    | $R_e$<br>( $\Omega$ ) | $R_i$<br>( $\Omega$ ) | $R_s$<br>( $\Omega$ ) | $R_{ct}$<br>( $\Omega$ ) | $Z_W$<br>( $\Omega$ ) |
|-----------|-----------------------|-----------------------|-----------------------|--------------------------|-----------------------|
| Fe-N-C    | 64.34                 | 84.98                 | 67.78                 | 19.17                    | 0.975                 |
| Cu-N-C    | 72.16                 | 52.45                 | 67.72                 | 39.9                     | 4.053                 |
| Fe-Cu-N-C | 72.84                 | 52.07                 | 93.73                 | 6.17                     | 0.133                 |

Table S6 The cyclability of aqueous batteries (including hybrid Li/Na-air/CO<sub>2</sub>, Zn-air batteries) between this work and other recently reported results

| Cell type                       | Cathode                                                | Cycling time (h) | Cycling number | Ref.                                                                                |
|---------------------------------|--------------------------------------------------------|------------------|----------------|-------------------------------------------------------------------------------------|
| <b>Hybrid Na-CO<sub>2</sub></b> | <b>Fe-Cu-N-C</b>                                       | <b>610</b>       | <b>1550</b>    | <b>This work</b>                                                                    |
| Hybrid Na-CO <sub>2</sub>       | Co/Co <sub>9</sub> S <sub>8</sub> @SNHC                | 160              | 200            | <i>Materials Today Energy</i> , 2021, 19: 100594 <sup>[37]</sup>                    |
| Hybrid Na-CO <sub>2</sub>       | N-SWCNH                                                | 150              | 300            | <i>Nano Energy</i> , 2020, 68: 104318.<br>[49]                                      |
| Hybrid Na-Air                   | D-Co-PBA+ Pt/C                                         | 340              | 1000           | <i>Materials Today Energy</i> , 2021, 20: 100572. <sup>[51]</sup>                   |
| Hybrid Na-Air                   | Pt <sub>3</sub> Ni1/NixFe-LDHs                         | 117              | 350            | <i>Journal of Materials Chemistry A</i> , 2020, 8(32): 16355-16365. <sup>[52]</sup> |
| Hybrid Na-Air                   | Fe-NiCoP                                               | 170              | 500            | <i>Applied Catalysis B: Environmental</i> , 2021, 285: 119786. <sup>[53]</sup>      |
| Hybrid Na-Air                   | MOF-NCNTs                                              | 100              | 150            | <i>Dalton Transactions</i> , 2021, 50(20): 7041-7047. <sup>[54]</sup>               |
| Hybrid Li-Air                   | Nd <sub>0.5</sub> Sr <sub>0.5</sub> CoO <sub>3-d</sub> | 40               | 20             | <i>Journal of Materials Chemistry A</i> , 2016, 4(6): 2122-2127. <sup>[55]</sup>    |
| Hybrid Li-Air                   | N-MC + NCONF@Ni                                        | 420              | 100            | <i>Energy &amp; Environmental Science</i> , 2014, 7(8): 2630. <sup>[56]</sup>       |
| Hybrid Li-Air                   | Co <sub>3</sub> O <sub>4</sub> /ON-CNW                 | 540              | 130            | <i>Nano Energy</i> , 2015, 12: 852-860. <sup>[57]</sup>                             |
| Zn-Air                          | CoS <sub>2</sub> /SKJ                                  | 340              | 255            | <i>ACS Nano</i> , 2019, 13(6): 7062-7072. <sup>[58]</sup>                           |
| Zn-Air                          | FeCo-NCps                                              | 156              | 1400           | <i>Journal of Materials Chemistry A</i> , 2019, 7(20): 12451-12456. <sup>[59]</sup> |
| Zn-Air                          | NDGs-800                                               | 78               | 234            | <i>ACS Energy Letters</i> , 2018, 3(5): 1183-1191. <sup>[60]</sup>                  |
| Zn-Air                          | HHPC                                                   | 388              | 1165           | <i>Applied Catalysis B: Environmental</i> , 2020, 265: 118603. <sup>[61]</sup>      |
